# Supplementary material for: Quantum transport evidence of Weyl fermions in an epitaxial ferromagnetic oxide
Source: PubMed Central journal article supplement (PMC7547107; doi:10.1038/s41467-020-18646-8), 2020-10-09
Supplement: 41467_2020_18646_MOESM1_ESM.pdf [file 41467_2020_18646_MOESM1_ESM.pdf]

## Supplementary Information

### Quantum transport evidence of Weyl fermions in an epitaxial ferromagnetic oxide

Kosuke Takiguchi,<sup>1,2,†</sup> Yuki K. Wakabayashi,<sup>1,\*†</sup> Hiroshi Irie,<sup>1</sup> Yoshiharu Krockenberger,<sup>1</sup>  
Takuma Otsuka,<sup>3</sup> Hiroshi Sawada,<sup>3</sup> Sergey A. Nikolaev,<sup>4,5</sup> Hena Das,<sup>4,5</sup> Masaaki Tanaka,<sup>2</sup>  
Yoshitaka Taniyasu,<sup>1</sup> and Hideki Yamamoto<sup>1</sup>

<sup>1</sup>*NTT Basic Research Laboratories, NTT Corporation, Atsugi, Kanagawa 243-0198, Japan.*

<sup>2</sup>*Department of Electrical Engineering and Information Systems & Center for Spintronics Research  
Network (CSRN), The University of Tokyo, 7-3-1 Hongo, Bunkyo-ku, Tokyo 113-8656, Japan.*

<sup>3</sup>*NTT Communication Science Laboratories, NTT Corporation, Soraku-gun, Kyoto 619-0237, Japan.*

<sup>4</sup>*Laboratory for Materials and Structures, Tokyo Institute of Technology, 4259 Nagatsuta, Midori-ku,  
Yokohama, Kanagawa 226-8503, Japan.*

<sup>5</sup>*Tokyo Tech World Research Hub Initiative (WRHI), Institute of Innovative Research, Tokyo Institute  
of Technology, 4259 Nagatsuta, Midori-ku, Yokohama, Kanagawa 226-8503, Japan.*

\*email: [yuuki.wakabayashi.we@hco.ntt.co.jp](mailto:yuuki.wakabayashi.we@hco.ntt.co.jp)

†These authors contributed equally to this work.

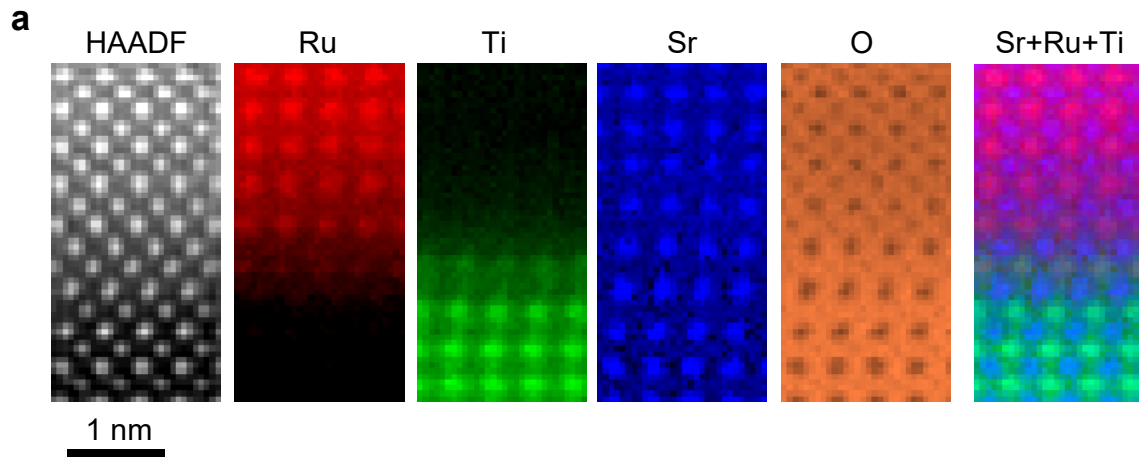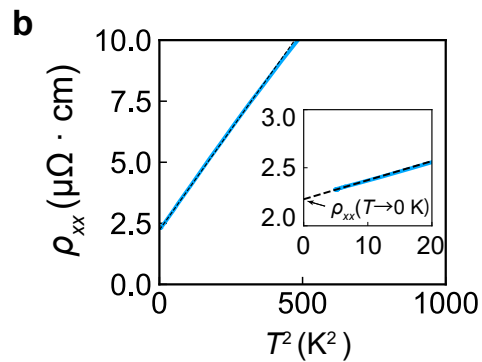

**Supplementary Fig. 1 HAADF-STEM and EELS-STEM images, and Fermi liquid behaviour in SrRuO<sub>3</sub>.** **a**, (From left to right) HAADF-STEM image of the SrRuO<sub>3</sub> film with the RRR of 71 taken along the [100] axis of the SrTiO<sub>3</sub> substrate. EELS-STEM images for the Ru- $M_{4,5}$ - (red), Ti- $L_{2,3}$ - (green), Sr- $M_3$ - (blue), O- $K$ -edge (orange), and a color overlay of the EELS-STEM images for Sr, Ru and Ti. **b**,  $\rho_{xx}(T)$  versus  $T^2$  curve (blue line) for the SrRuO<sub>3</sub> film with the RRR of 84.3. The black dashed line is the linear fitting result. Close-up near 0 K<sup>2</sup> is shown in the inset. The  $\rho_{xx}(T \rightarrow 0 \text{ K})$  value is estimated from the extrapolation of the fitting line to the 0 K<sup>2</sup> axis.

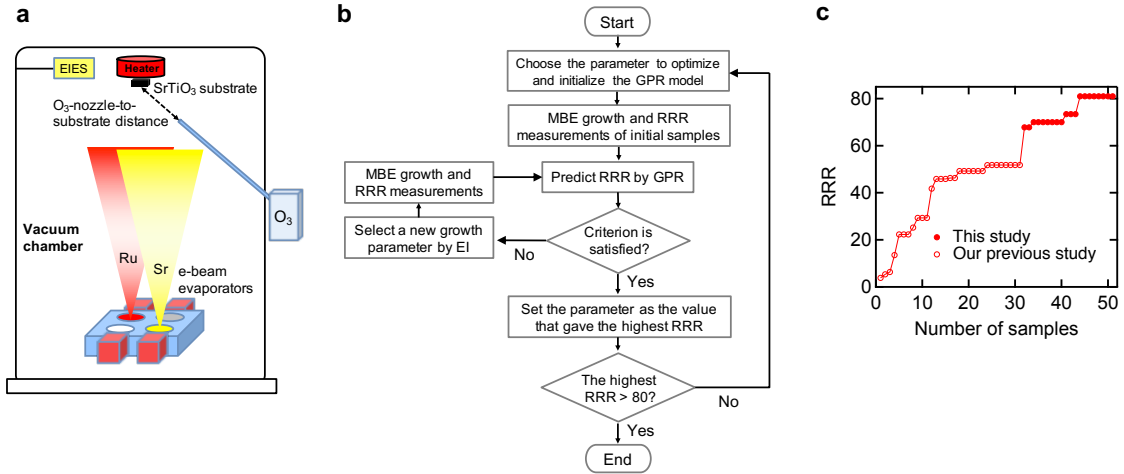

**Supplementary Fig. 2 Machine-learning-assisted MBE.** **a**, Schematic illustration of our multi-source oxide MBE system. EIES: electron impact emission spectroscopy. **b**, Flowchart of machine-learning-assisted MBE growth based on the BO algorithm. **c**, Highest experimental RRR values plotted as a function of the total number of MBE growth runs. In **c**, open circles are data deduced from Ref. 28. Here, the Ru flux rate, growth temperature, and nozzle-to-substrate distance were varied in ranges between 0.18 and 0.61  $\text{\AA s}^{-1}$ , 565 and 815 $^\circ\text{C}$ , and 1 and 31 mm, in correspondence to the search ranges in BO.

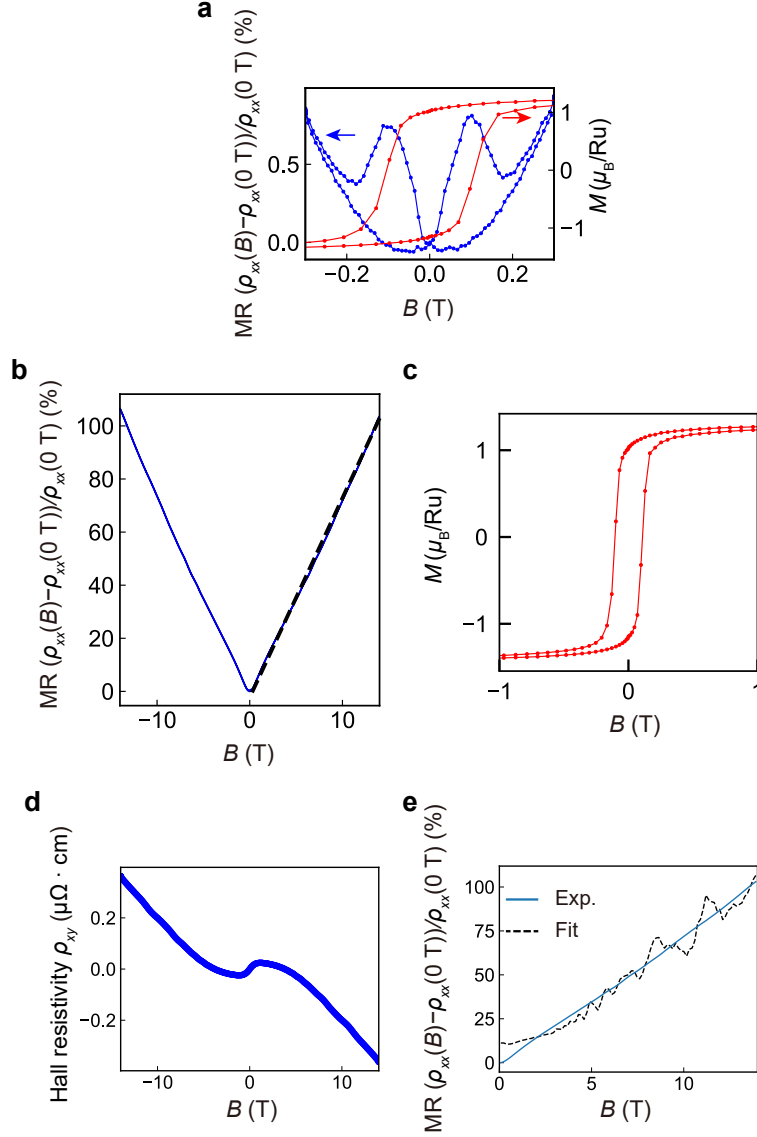

**Supplementary Fig. 3 Anisotropic MR and linear positive MR in SrRuO<sub>3</sub>** **a**, MR  $(\rho_{xx}(B) - \rho_{xx}(0 T)) / \rho_{xx}(0 T)$  at 2 K for the SrRuO<sub>3</sub> film with the RRR of 84.3 with  $-0.3 T < B < 0.3 T$  applied in the out-of-plane [001] direction of the SrTiO<sub>3</sub> substrate (blue filled circles). Magnetization  $M$  versus  $B$  ( $-0.3 T < B < 0.3 T$ ) curve at 10 K with  $B$  applied in the out-of-plane [001] direction of the SrTiO<sub>3</sub> substrate (red filled circles). **b**, MR  $(\rho_{xx}(B) - \rho_{xx}(0 T)) / \rho_{xx}(0 T)$  at 2 K for the SrRuO<sub>3</sub> film with the RRR of 84.3 with  $-14 T < B < 14 T$  applied in the out-of-plane [001] direction of the SrTiO<sub>3</sub> substrate. The black dashed line is an eye-guide to indicate the linearity of the MR. These are the same data in Fig. 1e in the main manuscript. **c**, Magnetization  $M$  versus  $B$  ( $-1 T < B < 1 T$ ) curve at 10 K with  $B$  applied in the out-of-plane [001] direction of the SrTiO<sub>3</sub> substrate. **d**, Hall resistivity  $\rho_{xy}(B)$  curve at 2 K for the SrRuO<sub>3</sub> film with the RRR of 84.3 with  $B$  applied in the out-of-plane [001] direction of the SrTiO<sub>3</sub> substrate. **e**, MR  $(\rho_{xx}(B) - \rho_{xx}(0 T)) / \rho_{xx}(0 T)$  observed from 0 to 14 T at 2 K (light blue line) and the fitting result by eq. (2) (black dashed line). In **d** and **e**,  $\rho_{xy}(B)$  and  $\rho_{xx}(B)$  are the same data in Fig. 1f and 1e, respectively. The oscillating behaviour of the fitting curve is due to the quantum oscillation of  $\rho_{xy}(B)$ .

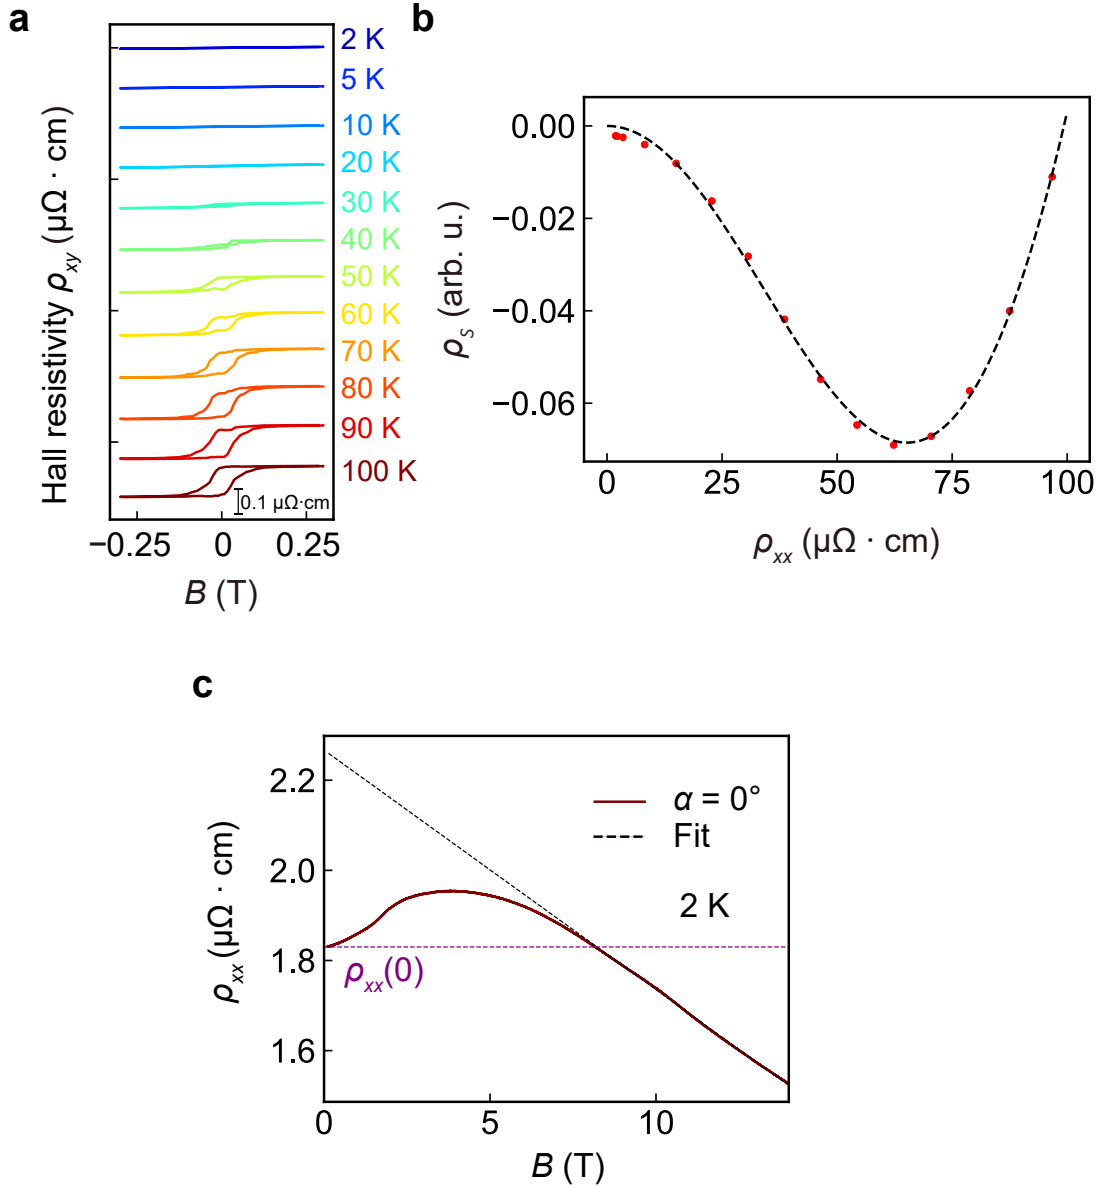

**Supplementary Fig. 4 Temperature dependence of the Hall resistivity and chiral-anomaly-induced linear and negative MR.** **a**, Hall resistivity  $\rho_{xy}(B)$  curves at 2 to 100 K for the SrRuO<sub>3</sub> film with the RRR of 84.3 with  $-0.3 \text{ T} < B < 0.3 \text{ T}$  applied in the out-of-plane [001] direction of the SrTiO<sub>3</sub> substrate. In **a**, the Hall resistivity at each temperature has been offset by  $0.15 \mu\Omega \cdot \text{cm}$  for easy viewing. **b**,  $\rho_s$  versus  $\rho_{xx}$  plot (red circles) and fitting results by eq. (4) (black dashed curve) up to 130 K. In **b**,  $\rho_s$  at each temperature was obtained by dividing  $\rho_{xy}(0 \text{ T})$  in Fig. 1f by  $M_\perp$  with 100 Oe obtained by the SQUID measurements. Here, the magnitude of  $\rho_{xy}(0 \text{ T})$  is defined as the averaged absolute value of  $\rho_{xy}$  at  $\pm 0.2 \text{ T}$ .  $\rho_{xx}$  at each temperature is the same data as in Fig. 1d. **c**,  $\rho_{xx}(B)$  at  $\alpha = 0$  (brown solid curve) for the SrRuO<sub>3</sub> film with the RRR of 84.3 and the linear fitting line (black dashed line) to  $\rho_{xx}(B)$  in the negative MR region ( $8 \text{ T} < B < 14 \text{ T}$ ). The fitting line completely reproduces the negative and linear MR region. The purple dashed line corresponds to the value of the zero field resistivity  $\rho_{xx}(0 \text{ T})$ .

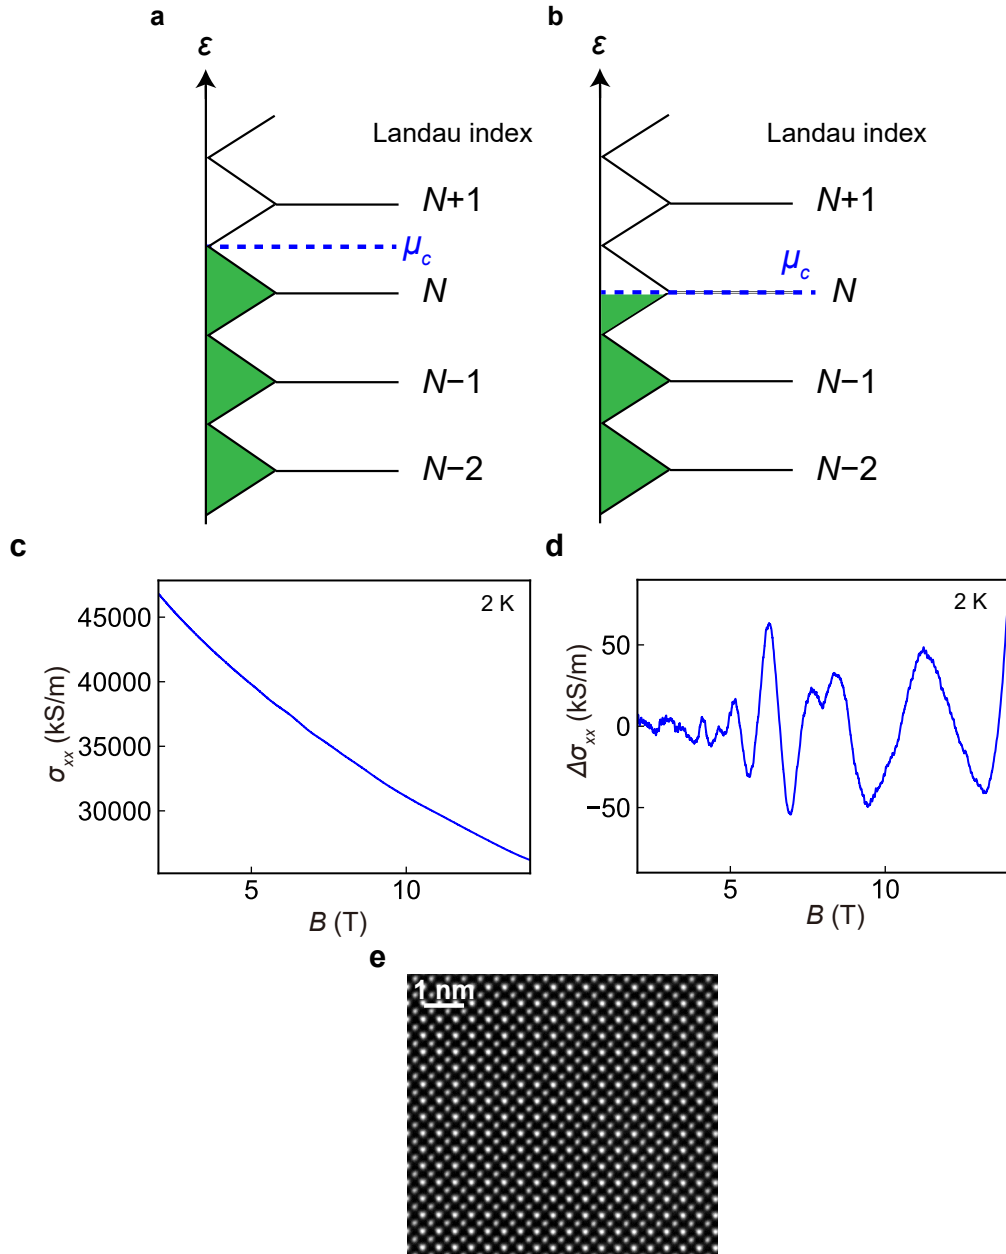

**Supplementary Fig. 5 Landau quantization and chemical potential, pretreatment of the SdH oscillation data and STEM image.** **a, b**, Schematic energy diagram of the relationship between Landau quantized levels  $\epsilon_N$  and chemical potential  $\mu_c$  which is located at the middle point between the  $N$ th and  $(N+1)$ th Landau level, and at the center of  $N$ th Landau level, respectively. The green region represents the filling ratio of each Landau level. In **a** and **b**, the  $N$ th Landau level is fully and half occupied, respectively. **c**, Raw  $\sigma_{xx}(B)$  data measured at 2 K and  $\beta = \gamma = 90^\circ$  for the SrRuO<sub>3</sub> film with the RRR of 84.3. The raw conductivity data is obtained by using  $\rho_{xx}(B)$  and  $\rho_{xy}(B)$  data as  $\sigma_{xx}(B) = \rho_{xx}(B)/((\rho_{xx}(B))^2 + (\rho_{xy}(B))^2)$ . **d**, SdH oscillation data  $\Delta\sigma_{xx}(B)$  obtained by subtracting a polynomial function up to the fifth order from  $\sigma_{xx}(B)$  in **c**. **e**, Cross-sectional high-angle annular dark field scanning transmission electron microscopy (HAADF-STEM) image of the SrRuO<sub>3</sub> film with the RRR of 71 taken along the [100] axis of the SrTiO<sub>3</sub> substrate.

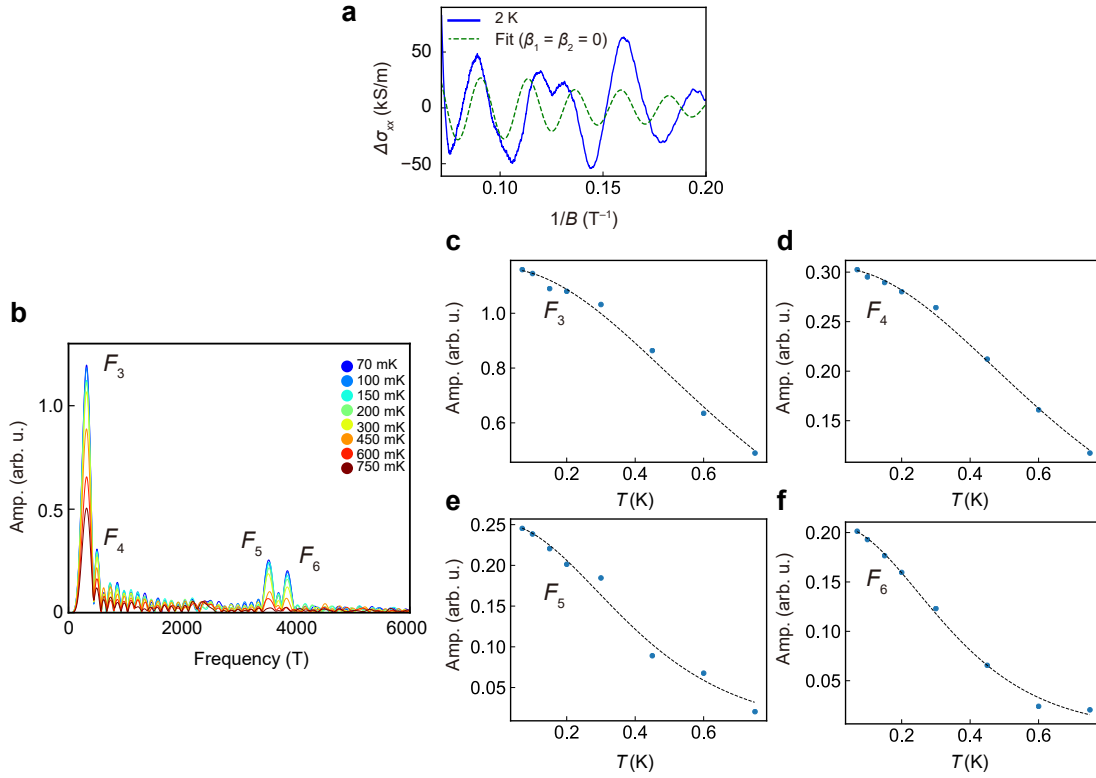

**Supplementary Fig. 6 LK theory fitting to the SdH oscillations with the fixed zero Berry phase and mass estimations of the trivial orbits.** **a**, SdH oscillation data at 2 K for the SrRuO<sub>3</sub> film with the RRR of 84.3 and the fitting results by eq. (1) with the zero Berry phases ( $\beta_1 = \beta_2 = 0$ ). The SdH oscillation is the same data as in Fig. 3b. The fitting was carried out by a non-linear least squares method with the fitting parameters  $A_1$ ,  $T_{D1}$ ,  $A_2$ , and  $T_{D2}$ . The fitting curve cannot reproduce the experimental data well, confirming the existence of the non-zero Berry phase. **b**, Fourier transform spectra of the SdH oscillations from 70 to 750 mK for the SrRuO<sub>3</sub> film with the RRR of 84.3. The spectra are obtained by fast Fourier transform for the oscillation data  $\Delta\rho_{xx}(B)$  from 12.5 T to 14 T.  $F_3$ ,  $F_4$ ,  $F_5$ , and  $F_6$  peaks correspond to 300, 500, 3500, and 3850 T, respectively. **c-f**, Mass estimations for the  $F_3$ ,  $F_4$ ,  $F_5$ , and  $F_6$  orbits according to the LK theory. Black dashed curves are fitting curves.

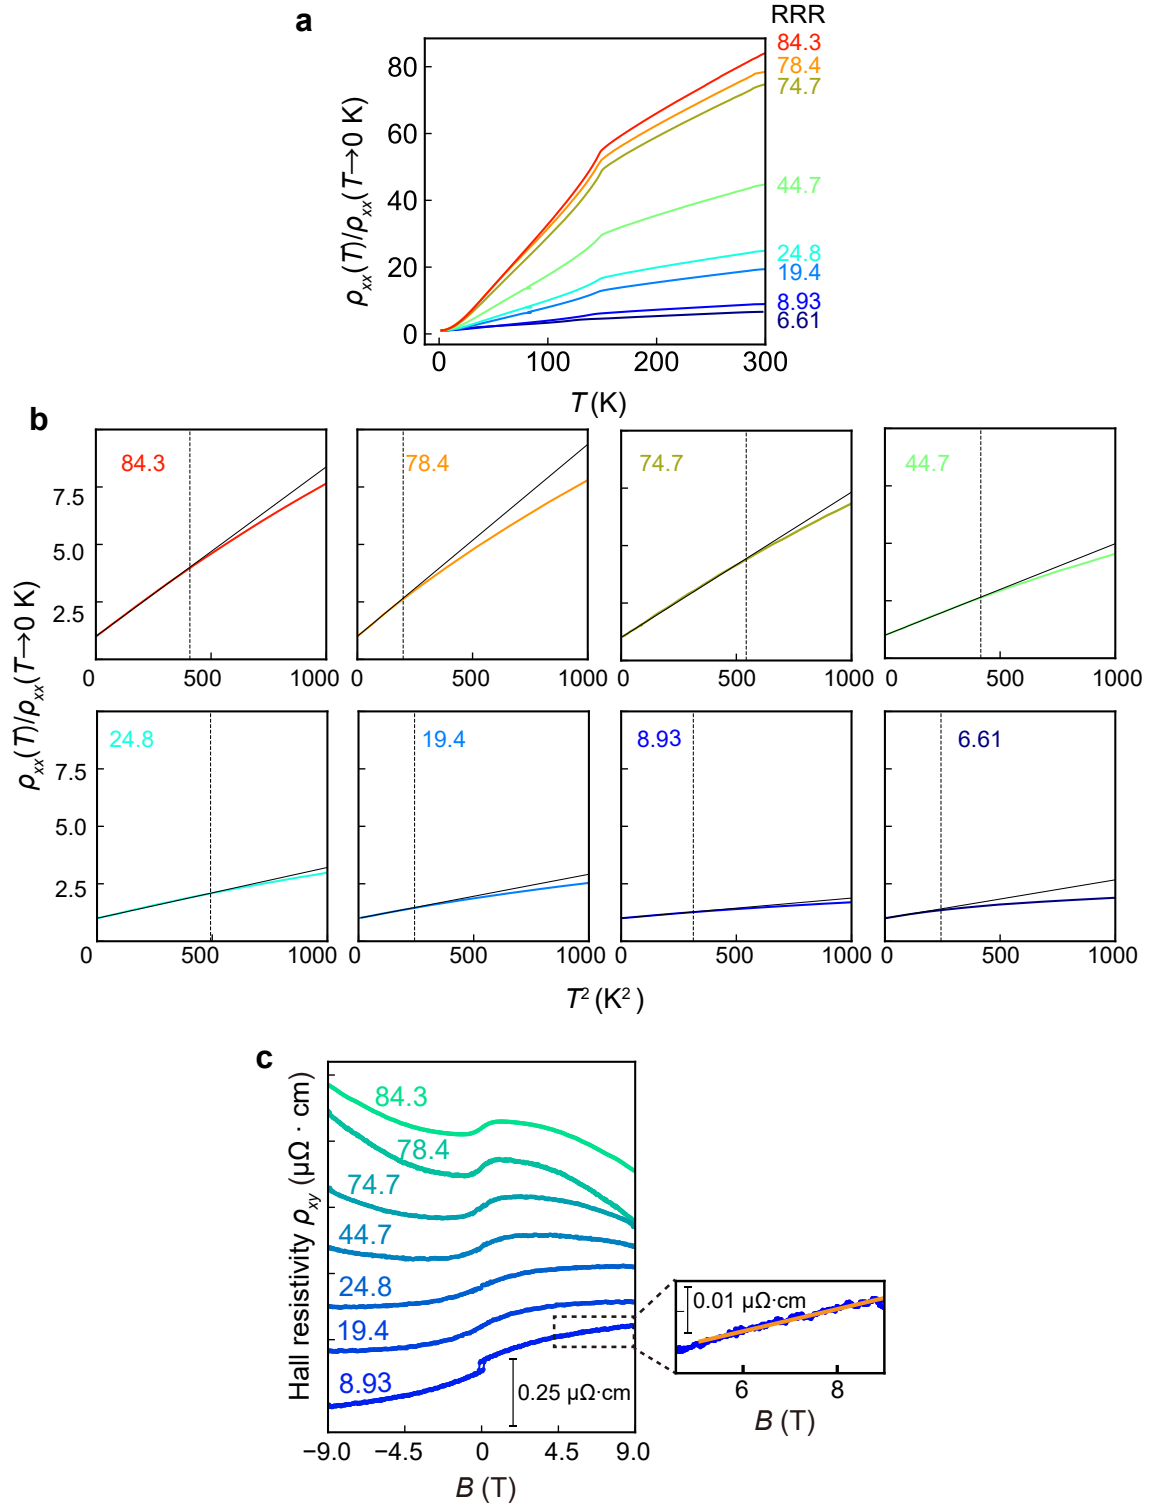

**Supplementary Fig. 7 RRR dependence of  $T_C$ ,  $T_F$ , and Hall resistivity.** **a**,  $\rho_{xx}(T)/\rho_{xx}(T \rightarrow 0 \text{ K})$  versus  $T$  of the different RRR samples. The kinks around 150 K correspond to  $T_C$  of the samples. **b**,  $\rho_{xx}(T)/\rho_{xx}(T \rightarrow 0 \text{ K})$  versus  $T^2$  curves with the linear fittings (black lines) for the different RRR samples. The black dashed lines correspond to  $T_F^2$  where the experimental  $\rho_{xx}$  and the fitting line are close enough ( $< 0.1 \mu\Omega \text{ cm}$ ). **c**, Hall resistivity  $\rho_{xy}(B)$  curves of the different RRR samples at 2 or 2.3 K with  $B$  applied in the out-of-plane [001] direction of the SrTiO<sub>3</sub> substrate. The right-side figure is enlarged graph of  $\rho_{xy}(B)$  with RRR = 8.93 at 4.5 T  $< B < 9$  T. The orange line is the linear fitting result from 5T to 9 T for estimating the carrier density and mobility.



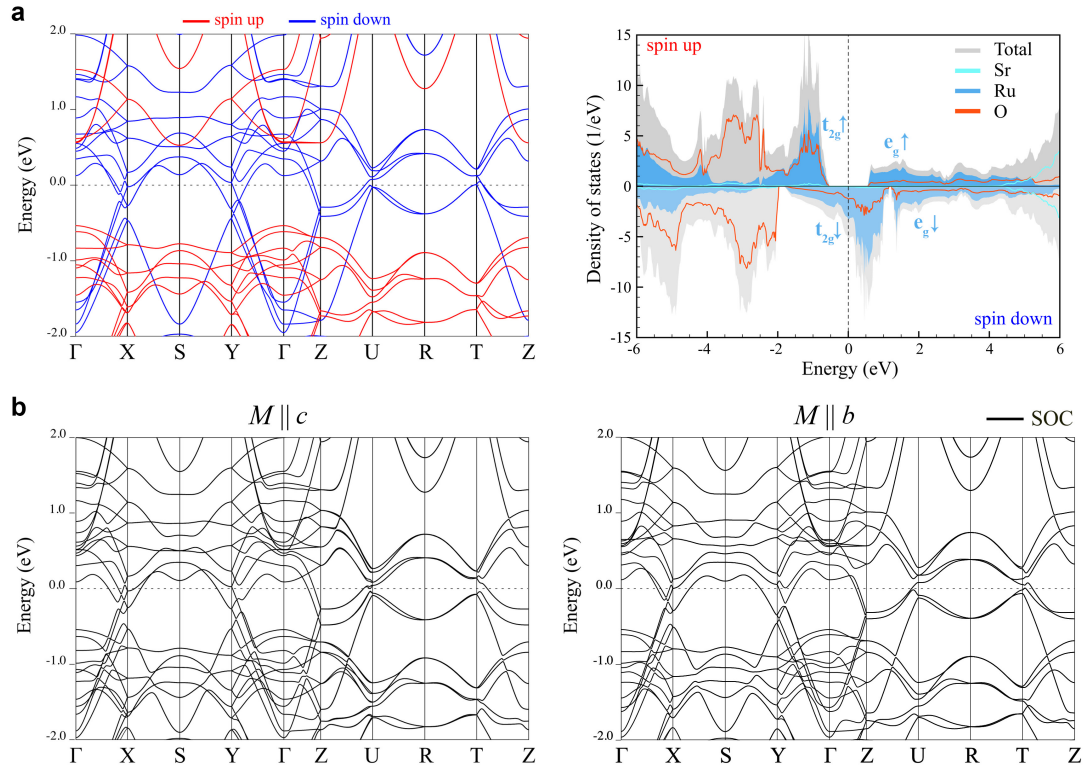

**Supplementary Fig. 8 Electronic structure of orthorhombic SrRuO<sub>3</sub> calculated within GGA+*U* with *U* = 2.6 eV and *J* = 0.6 eV. **a**, Band structure (left) and density of states (right) for the ferromagnetic state without SOC. **b**, Band structure for the ferromagnetic state with SOC and the magnetization along the orthorhombic *c* and *b* axes (left and right, respectively) calculated within GGA+*U*+SOC. Fractional coordinates of the high-symmetry *k*-points are  $\Gamma$  (0,0,0), X (0.5,0,0), S (0.5,0.5,0), Y (0,0.5,0), Z (0,0,0.5), U (0.5,0,0.5), R (0.5,0.5,0.5), and T (0,0.5,0.5).**

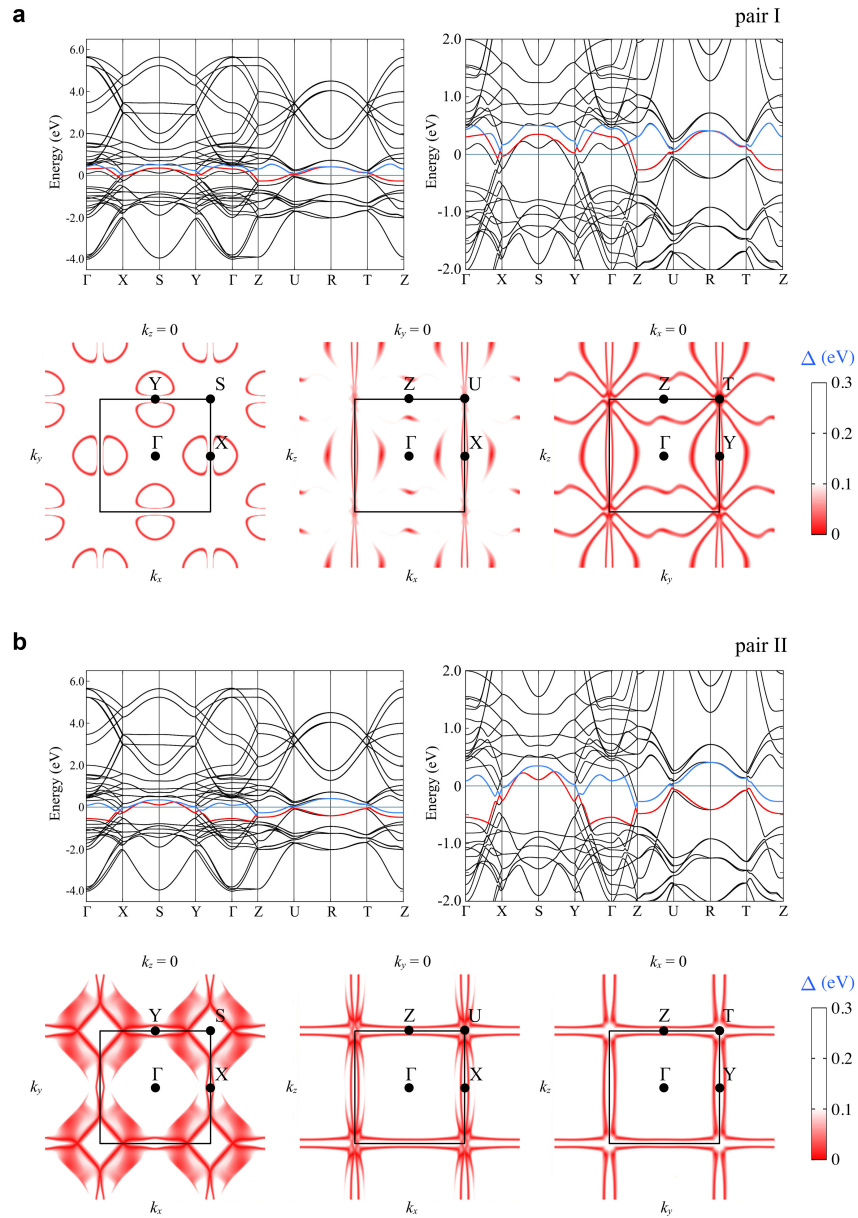

**Supplementary Fig. 9 Pairs of bands I and II in the case of magnetization along the orthorhombic  $c$  axis. a**, Gap function  $\Delta \leq 0.1$  eV for the pair I (red and blue bands in upper figures in **a**) in the  $k_z = 0, k_y = 0, k_x = 0$  planes. **b**, Gap function  $\Delta \leq 0.1$  eV for the pair II (red and blue bands in upper figures in **b**) in the  $k_z=0, k_y=0, k_x=0$  planes. The band structure is interpolated in the Wannier basis representing the  $t_{2g}$  and  $e_g$  states based on the electronic structure calculated within GGA+ $U$ +SOC.

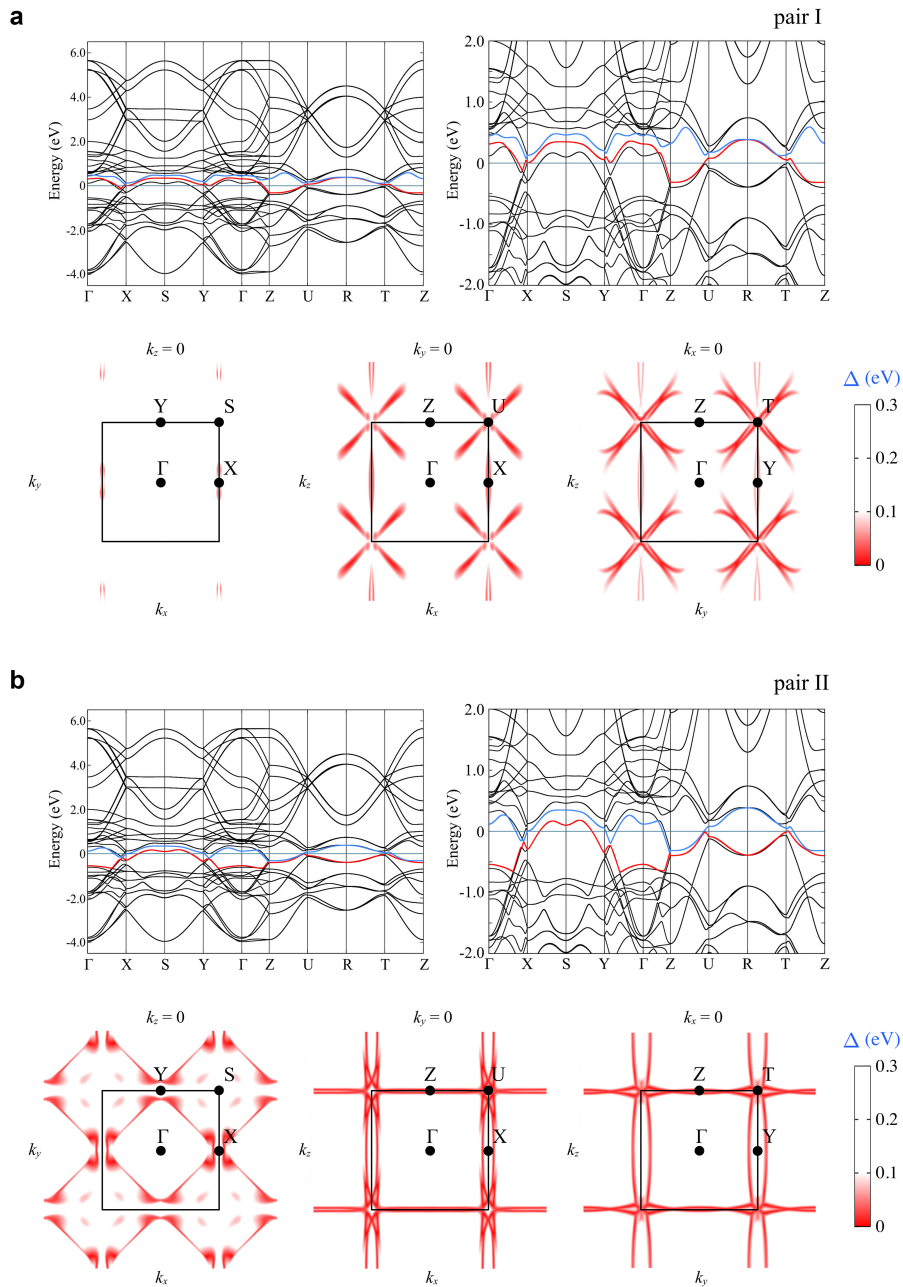

**Supplementary Fig. 10 Pairs of bands I and II in the case of magnetization along the orthorhombic  $b$  axis. a**, Gap function  $\Delta \leq 0.1$  eV for the pair I (red and blue bands in upper figures in **a**) in the  $k_z = 0$ ,  $k_y = 0$ ,  $k_x = 0$  planes. **b**, Gap function  $\Delta \leq 0.1$  eV for the pair II (red and blue bands in upper graphs in **b**) in the  $k_z = 0$ ,  $k_y = 0$ ,  $k_x = 0$  planes. The band structure is interpolated in the Wannier basis representing the  $t_{2g}$  and  $e_g$  states based on the electronic structure calculated within GGA+ $U$ +SOC.

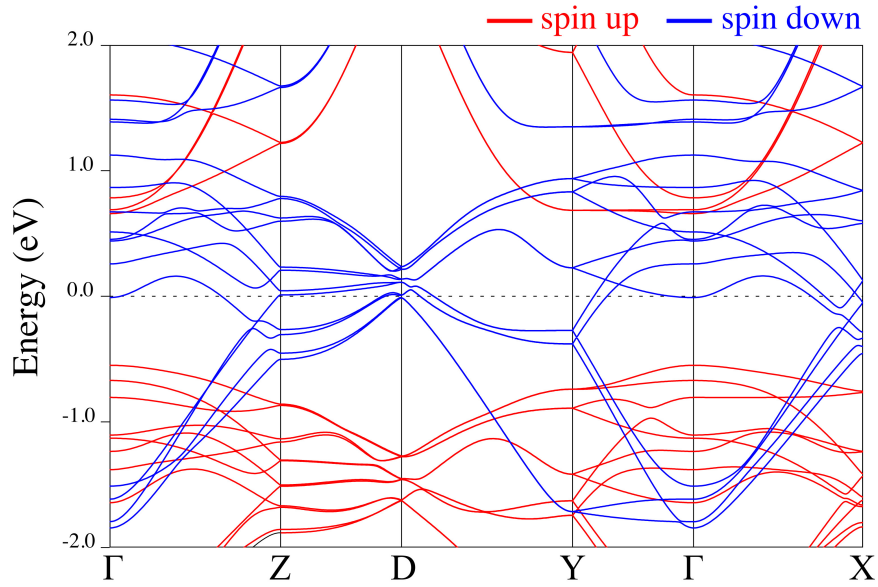

**Supplementary Fig. 11** Electronic structure of monoclinic SrRuO<sub>3</sub> in the ferromagnetic state without SOC calculated within GGA+ $U$  with  $U = 2.6$  eV and  $J = 0.6$  eV. Fractional coordinates of the high-symmetry  $k$ -points are  $\Gamma$  (0,0,0), Z (0.5,0,0), D (0.5,0,0.5), Y (0,0,0.5), and X (0,0.5,0).

**Supplementary Table 1** Frequencies and effective cyclotron masses estimated from SdH oscillations in the SrRuO<sub>3</sub> film with RRR = 84.3. Frequencies and effective cyclotron masses estimated in Fig. 3c and Supplementary Fig. 6c-f.  $m_0$  represents the free electron mass in a vacuum.

|           | $F_1$ | $F_2$ | $F_3$ | $F_4$ | $F_5$ | $F_6$ |
|-----------|-------|-------|-------|-------|-------|-------|
| $F$ (T)   | 26    | 44    | 300   | 500   | 3500  | 3850  |
| $m^*/m_0$ | 0.35  | 0.58  | 2.9   | 3.1   | 5.0   | 5.8   |

**Supplementary Table 2 Magnetic moments (in  $\mu_B$ ) of SrRuO<sub>3</sub> in the ferromagnetic state as obtained from GGA+*U*+SOC.** Second and third columns show the calculated magnetic moments in  $\mu_B$  units when the magnetization is along the orthorhombic *c* and *b* axes, respectively. ***S*** and ***L*** are spin and orbital magnetic moments, respectively. Ru sites are given in fractional coordinates.

| Ru site       | <i>M</i> ∥ <i>c</i>                                                              | <i>M</i> ∥ <i>b</i>                                                                    |
|---------------|----------------------------------------------------------------------------------|----------------------------------------------------------------------------------------|
| (0.5, 0, 0)   | <b><i>S</i></b> = (0.064, 0.010, 1.399)<br><b><i>L</i></b> = (0, -0.005, 0.074)  | <b><i>S</i></b> = (0.057, 1.398, -0.020)<br><b><i>L</i></b> = (0.003, 0.099, -0.008)   |
| (0, 0.5, 0)   | <b><i>S</i></b> = (-0.064, 0.010, 1.400)<br><b><i>L</i></b> = (0, -0.005, 0.074) | <b><i>S</i></b> = (-0.056, 1.400, -0.021)<br><b><i>L</i></b> = (-0.003, 0.099, -0.008) |
| (0.5, 0, 0.5) | <b><i>S</i></b> = (-0.064, -0.010, 1.397)<br><b><i>L</i></b> = (0, 0.005, 0.074) | <b><i>S</i></b> = (0.059, 1.397, -0.020)<br><b><i>L</i></b> = (0.003, 0.099, 0.008)    |
| (0.5, 0, 0.5) | <b><i>S</i></b> = (0.064, -0.010, 1.396)<br><b><i>L</i></b> = (0, 0.005, 0.074)  | <b><i>S</i></b> = (-0.057, 1.399, -0.021)<br><b><i>L</i></b> = (-0.003, 0.099, 0.008)  |

**Supplementary Table 3 Weyl points calculated for the pair of bands I for the case of the magnetization along the  $c$  axis.** The  $k$ -points are given in fractional coordinates.

| #                 | $E-E_F$ (eV) | $(k_x, k_y, k_z)$        | Chirality |
|-------------------|--------------|--------------------------|-----------|
| WP <sub>z11</sub> | 0.204        | (0, 0, 0.332)            | 1         |
| WP <sub>z12</sub> | 0.204        | (0, 0, -0.332)           | -1        |
| WP <sub>z21</sub> | 0.214        | (0, 0.307, 0.357)        | -1        |
| WP <sub>z22</sub> | 0.219        | (0, 0.305, -0.355)       | 1         |
| WP <sub>z23</sub> | 0.219        | (0, -0.305, 0.355)       | -1        |
| WP <sub>z24</sub> | 0.214        | (0, -0.307, -0.357)      | 1         |
| WP <sub>z31</sub> | 0.117        | (0, 0.485, 0.456)        | -1        |
| WP <sub>z32</sub> | 0.116        | (0, -0.484, 0.456)       | -1        |
| WP <sub>z33</sub> | 0.116        | (0, 0.484, -0.456)       | 1         |
| WP <sub>z34</sub> | 0.117        | (0, -0.485, -0.456)      | 1         |
| WP <sub>z41</sub> | 0.102        | (-0.022, 0.439, -0.478)  | -1        |
| WP <sub>z42</sub> | 0.102        | (0.020, 0.439, -0.478)   | -1        |
| WP <sub>z43</sub> | 0.101        | (-0.027, 0.437, 0.479)   | 1         |
| WP <sub>z44</sub> | 0.101        | (0.029, 0.436, 0.479)    | 1         |
| WP <sub>z45</sub> | 0.102        | (-0.021, -0.439, 0.479)  | 1         |
| WP <sub>z46</sub> | 0.102        | (0.023, -0.438, 0.479)   | 1         |
| WP <sub>z47</sub> | 0.101        | (0.027, -0.437, -0.479)  | -1        |
| WP <sub>z48</sub> | 0.101        | (-0.029, -0.436, -0.479) | -1        |
| WP <sub>z51</sub> | 0.089        | (0.235, -0.306, 0.483)   | -1        |
| WP <sub>z52</sub> | 0.087        | (0.233, 0.306, 0.483)    | -1        |
| WP <sub>z53</sub> | 0.087        | (0.233, -0.306, -0.483)  | 1         |
| WP <sub>z54</sub> | 0.089        | (0.235, 0.306, -0.483)   | 1         |
| WP <sub>z55</sub> | 0.087        | (-0.233, 0.306, 0.483)   | -1        |
| WP <sub>z56</sub> | 0.087        | (-0.233, -0.306, -0.483) | 1         |
| WP <sub>z57</sub> | 0.089        | (-0.235, 0.306, -0.483)  | 1         |
| WP <sub>z58</sub> | 0.089        | (-0.235, -0.306, 0.483)  | -1        |

**Supplementary Table 4 Weyl points calculated for the pair of bands II for the case of the magnetization along the  $c$  axis.** The  $k$ -points are given in fractional coordinates.

| #                               | $E-E_F$ (eV) | $(k_x, k_y, k_z)$        | Chirality |
|---------------------------------|--------------|--------------------------|-----------|
| WP <sub>z</sub> 6 <sub>1</sub>  | -0.008       | (0, 0.464, 0.400)        | 1         |
| WP <sub>z</sub> 6 <sub>2</sub>  | -0.016       | (0, 0.464, -0.400)       | -1        |
| WP <sub>z</sub> 6 <sub>3</sub>  | -0.016       | (0, -0.464, 0.400)       | 1         |
| WP <sub>z</sub> 6 <sub>4</sub>  | -0.008       | (0, -0.464, -0.400)      | -1        |
| WP <sub>z</sub> 7 <sub>1</sub>  | -0.104       | (0.452, 0, 0.385)        | -1        |
| WP <sub>z</sub> 7 <sub>2</sub>  | -0.104       | (-0.452, 0, -0.385)      | 1         |
| WP <sub>z</sub> 7 <sub>3</sub>  | -0.122       | (0.450, 0, -0.368)       | 1         |
| WP <sub>z</sub> 7 <sub>4</sub>  | -0.122       | (-0.450, 0, 0.368)       | -1        |
| WP <sub>z</sub> 8 <sub>1</sub>  | 0.239        | (0.276, 0.485, -0.205)   | 1         |
| WP <sub>z</sub> 8 <sub>2</sub>  | 0.225        | (0.266, 0.483, 0.223)    | -1        |
| WP <sub>z</sub> 8 <sub>3</sub>  | 0.220        | (0.262, -0.483, 0.228)   | -1        |
| WP <sub>z</sub> 8 <sub>4</sub>  | 0.231        | (0.270, -0.484, -0.215)  | 1         |
| WP <sub>z</sub> 8 <sub>5</sub>  | 0.238        | (-0.275, -0.485, 0.209)  | -1        |
| WP <sub>z</sub> 8 <sub>6</sub>  | 0.230        | (-0.269, 0.484, 0.218)   | -1        |
| WP <sub>z</sub> 8 <sub>7</sub>  | 0.220        | (-0.262, 0.483, -0.228)  | 1         |
| WP <sub>z</sub> 8 <sub>8</sub>  | 0.227        | (-0.267, -0.484, -0.220) | 1         |
| WP <sub>z</sub> 9 <sub>1</sub>  | 0.142        | (-0.492, 0.187, 0.170)   | -1        |
| WP <sub>z</sub> 9 <sub>2</sub>  | 0.142        | (0.492, 0.188, 0.170)    | -1        |
| WP <sub>z</sub> 9 <sub>3</sub>  | 0.151        | (0.492, -0.191, 0.175)   | -1        |
| WP <sub>z</sub> 9 <sub>4</sub>  | 0.149        | (-0.492, -0.191, 0.174)  | -1        |
| WP <sub>z</sub> 9 <sub>5</sub>  | 0.142        | (-0.491, 0.193, -0.176)  | 1         |
| WP <sub>z</sub> 9 <sub>6</sub>  | 0.142        | (-0.492, -0.188, -0.171) | 1         |
| WP <sub>z</sub> 9 <sub>7</sub>  | 0.149        | (0.492, -0.188, -0.171)  | 1         |
| WP <sub>z</sub> 9 <sub>8</sub>  | 0.150        | (0.492, 0.192, -0.175)   | 1         |
| WP <sub>z</sub> 10 <sub>1</sub> | 0.257        | (0.408, -0.379, -0.121)  | -1        |
| WP <sub>z</sub> 10 <sub>2</sub> | 0.257        | (0.426, 0.362, -0.123)   | -1        |
| WP <sub>z</sub> 10 <sub>3</sub> | 0.257        | (0.425, -0.363, 0.124)   | 1         |
| WP <sub>z</sub> 10 <sub>4</sub> | 0.258        | (-0.412, 0.374, 0.128)   | 1         |
| WP <sub>z</sub> 10 <sub>5</sub> | 0.258        | (-0.412, -0.375, -0.129) | -1        |
| WP <sub>z</sub> 10 <sub>6</sub> | 0.256        | (-0.427, 0.360, -0.116)  | -1        |
| WP <sub>z</sub> 10 <sub>7</sub> | 0.258        | (0.403, 0.384, 0.119)    | 1         |
| WP <sub>z</sub> 10 <sub>8</sub> | 0.256        | (-0.428, -0.359, 0.116)  | 1         |



**Supplementary Table 5 Weyl points calculated for the pair of bands I for the case of the magnetization along the  $b$  axis.** The  $k$ -points are given in fractional coordinates.

| #                              | $E-E_F$ (eV) | $(k_x, k_y, k_z)$        | Chirality |
|--------------------------------|--------------|--------------------------|-----------|
| WP <sub>y</sub> 1 <sub>1</sub> | 0.160        | (0, 0.378, 0.395)        | 1         |
| WP <sub>y</sub> 1 <sub>2</sub> | 0.152        | (0, 0.379, -0.394)       | 1         |
| WP <sub>y</sub> 1 <sub>3</sub> | 0.160        | (0, -0.378, -0.395)      | -1        |
| WP <sub>y</sub> 1 <sub>4</sub> | 0.152        | (0, -0.379, 0.394)       | -1        |
| WP <sub>y</sub> 2 <sub>1</sub> | 0.126        | (0.485, -0.095, 0)       | 1         |
| WP <sub>y</sub> 2 <sub>2</sub> | 0.128        | (-0.486, -0.097, 0)      | 1         |
| WP <sub>y</sub> 2 <sub>3</sub> | 0.128        | (0.486, 0.097, 0)        | -1        |
| WP <sub>y</sub> 2 <sub>4</sub> | 0.152        | (-0.485, 0.095, 0)       | -1        |
| WP <sub>y</sub> 3 <sub>1</sub> | 0.275        | (0, -0.326, -0.297)      | -1        |
| WP <sub>y</sub> 3 <sub>2</sub> | 0.275        | (0, 0.326, 0.297)        | 1         |
| WP <sub>y</sub> 3 <sub>3</sub> | 0.282        | (0, 0.321, -0.294)       | 1         |
| WP <sub>y</sub> 3 <sub>4</sub> | 0.281        | (0, -0.321, 0.294)       | -1        |
| WP <sub>y</sub> 4 <sub>1</sub> | 0.168        | (0.323, -0.081, -0.375)  | -1        |
| WP <sub>y</sub> 4 <sub>2</sub> | 0.163        | (0.331, 0.076, -0.379)   | 1         |
| WP <sub>y</sub> 4 <sub>3</sub> | 0.165        | (0.329, -0.077, 0.377)   | -1        |
| WP <sub>y</sub> 4 <sub>4</sub> | 0.168        | (-0.323, 0.082, 0.375)   | 1         |
| WP <sub>y</sub> 4 <sub>5</sub> | 0.165        | (-0.329, 0.077, -0.377)  | 1         |
| WP <sub>y</sub> 4 <sub>6</sub> | 0.163        | (-0.331, -0.076, 0.379)  | -1        |
| WP <sub>y</sub> 4 <sub>7</sub> | 0.177        | (0.306, 0.092, 0.368)    | 1         |
| WP <sub>y</sub> 4 <sub>8</sub> | 0.177        | (-0.306, -0.092, -0.368) | -1        |
| WP <sub>y</sub> 5 <sub>1</sub> | 0.113        | (-0.172, 0.308, -0.437)  | -1        |
| WP <sub>y</sub> 5 <sub>2</sub> | 0.112        | (0.174, -0.306, 0.437)   | 1         |
| WP <sub>y</sub> 5 <sub>3</sub> | 0.098        | (0.196, -0.307, -0.452)  | 1         |
| WP <sub>y</sub> 5 <sub>4</sub> | 0.103        | (0.191, 0.305, 0.449)    | -1        |
| WP <sub>y</sub> 5 <sub>5</sub> | 0.099        | (-0.196, 0.303, 0.451)   | -1        |
| WP <sub>y</sub> 5 <sub>6</sub> | 0.102        | (-0.193, -0.304, -0.450) | 1         |
| WP <sub>y</sub> 5 <sub>7</sub> | 0.096        | (-0.201, -0.302, 0.454)  | 1         |
| WP <sub>y</sub> 5 <sub>8</sub> | 0.096        | (0.201, 0.302, -0.454)   | -1        |

**Supplementary Table 6 Weyl points calculated for the pair of bands II for the case of the magnetization along the  $b$  axis.** The  $k$ -points are given in fractional coordinates.

| #                              | $E-E_F$ (eV) | $(k_x, k_y, k_z)$   | Chirality |
|--------------------------------|--------------|---------------------|-----------|
| WP <sub>y</sub> 6 <sub>1</sub> | -0.070       | (0, 0.441, -0.349)  | 1         |
| WP <sub>y</sub> 6 <sub>2</sub> | -0.060       | (0, 0.441, 0.350)   | 1         |
| WP <sub>y</sub> 6 <sub>3</sub> | -0.070       | (0, -0.441, 0.349)  | -1        |
| WP <sub>y</sub> 6 <sub>4</sub> | -0.060       | (0, -0.441, -0.349) | -1        |
| WP <sub>y</sub> 7 <sub>1</sub> | -0.318       | (0.155, -0.328, 0)  | 1         |
| WP <sub>y</sub> 7 <sub>2</sub> | -0.331       | (0.169, 0.313, 0)   | -1        |
| WP <sub>y</sub> 7 <sub>3</sub> | -0.320       | (-0.157, 0.326, 0)  | -1        |
| WP <sub>y</sub> 7 <sub>4</sub> | -0.331       | (-0.168, -0.314, 0) | 1         |
| WP <sub>y</sub> 8 <sub>1</sub> | -0.243       | (-0.398, -0.101, 0) | -1        |
| WP <sub>y</sub> 8 <sub>2</sub> | -0.260       | (-0.391, 0.104, 0)  | 1         |
| WP <sub>y</sub> 8 <sub>3</sub> | -0.240       | (0.399, 0.100, 0)   | 1         |
| WP <sub>y</sub> 8 <sub>4</sub> | -0.260       | (0.390, -0.104, 0)  | -1        |
| WP <sub>y</sub> 9 <sub>1</sub> | -0.160       | (0.454, 0.020, 0)   | -1        |
| WP <sub>y</sub> 9 <sub>2</sub> | -0.160       | (-0.454, -0.021, 0) | 1         |
| WP <sub>y</sub> 9 <sub>3</sub> | -0.153       | (-0.455, 0.026, 0)  | -1        |
| WP <sub>y</sub> 9 <sub>4</sub> | -0.154       | (0.455, -0.025, 0)  | 1         |
