# Supplementary material for: Quantum transport evidence of Weyl fermions in an epitaxial ferromagnetic oxide
Source: PubMed Central journal article supplement (PMC7547107; doi:10.1038/s41467-020-18646-8), 2020-10-09
Supplement: 41467_2020_18646_MOESM2_ESM.pdf [file 41467_2020_18646_MOESM2_ESM.pdf]

Editorial Note: This manuscript has been previously reviewed at another journal that is not operating a transparent peer review scheme. The manuscript was considered suitable for publication without further review at Nature Communications .
